# Supplementary material for: Creation of a prototype biomimetic fish to better understand impact trauma caused by hydropower turbine blade strikes
Source: PeerJ journal article supplement (doi:10.7717/peerj-matsci.16), 2021-08-17
Supplement: Saylor_et_al._Biomimetic_Model_Fish_-_Inferential_Statistics_Data.xlsx [file Saylor_et_al._Biomimetic_Model_Fish_-_Inferential_Statistics_Data.xlsx]

## Sheet: BGconc
Conc	Group	D30		Variable	Definition
10	ten	14.74		Conc	Concentration of ballistic gelatin (weight:volume) in dionized water; percentage
10	ten	17.63		Group	Group name related to ballistic gelatin concentration used in the one-way analysis of variance (R statistical programming)
10	ten	14.75		D30	Durometer of ballistic gelatin sample following 30 minutes of warming at room temperature (~22 °C)
15	fifteen	21.64
15	fifteen	20.39
15	fifteen	21.4
20	twenty	29.36
20	twenty	34.11
20	twenty	29.37
25	twenfive	38.97
25	twenfive	38.1
25	twenfive	38.56
30	thirty	45.89
30	thirty	43
30	thirty	43.84

## Sheet: BGtemp
Temp	Group	D30		Variable	Definition
45	fourfive	35.52		Temp	Heated hydration temperature used to create a 25% ballistic gelatin solution (weight:volume); °C
45	fourfive	36.24		Group	Group name related to heated hydration temperature used in the one-way analysis of variance (R statistical programming)
45	fourfive	34.56		D30	Durometer of ballistic gelatin sample following 30 minutes of warming at room temperature (~22 °C)
55	fivefive	33.37
55	fivefive	37.25
55	fivefive	36.21
65	sixfive	34.4
65	sixfive	35.36
65	sixfive	36.57

## Sheet: BGwarm
Time	ID	Group	D	Temp		Variable	Definition
0	1	zero	54.02	10.2		Time	Warming time (minutes) of the gelatin samples at room temperature (~22 °C) following over night refrigeration
0	2	zero	55.3	9.8		ID	Individual gelatin sample number measured over multiple warming periods (n = 3 replicates; repeated measurements over time)
0	3	zero	55.64	10.8		Group	Group name related to warming time used in the repeated measures one-way analysis of variance (R statistical programming)
10	1	ten	52.74	13.7		D	Durometer of ballistic gelatin sample following each warming period at room temperature (~22 °C)
10	2	ten	54.16	13.7		Temp	Measured temperature of ballistic gelatin sample after each warming period (22 °C)
10	3	ten	54.72	13.1
20	1	twenty	52.04	15.3
20	2	twenty	53.6	15.3
20	3	twenty	53.32	15.2
30	1	thirty	50.66	16.9
30	2	thirty	51.9	17
30	3	thirty	51.98	17.5
40	1	forty	49.02	18.5
40	2	forty	50.64	18.4
40	3	forty	50.1	18.5
50	1	fifty	47.42	18.8
50	2	fifty	49.5	18.6
50	3	fifty	49.08	18.9
60	1	sixty	46.6	19
60	2	sixty	48.24	18.8
60	3	sixty	48.42	19.1
75	1	7five	45.38	19.2
75	2	7five	47.82	18.9
75	3	7five	47.52	19.1
90	1	ninety	45.32	19.2
90	2	ninety	46.98	19.1
90	3	ninety	46.74	19
105	1	1ohfive	44.08	19.5
105	2	1ohfive	45.98	19.2
105	3	1ohfive	45.56	19.2
120	1	1twenty	43.84	19.4
120	2	1twenty	45.14	19.4
120	3	1twenty	45.08	19.4
150	1	1fifty	42.6	20
150	2	1fifty	44.46	19.4
150	3	1fifty	45.06	19.6
180	1	1eighty	42.28	19.7
180	2	1eighty	44.16	19.6
180	3	1eighty	43.92	19.6
210	1	2ten	42.08	19.7
210	2	2ten	43.8	19.7
210	3	2ten	45.08	19.8
240	1	2forty	42.66	20
240	2	2forty	45.38	19.7
240	3	2forty	45.36	19.9

## Sheet: BGskin
Skin	ID	D30		Variable	Definition
none	1	42.46		Skin	Number of layers of surrogate skin (Plasti Dip) applied to each replicate ballistic gelatin sample
none	2	41.36		ID	Individual gelatin sample number measured before and after application of surrogate skin layers (n = 3 replicates; repeated measurements over time)
none	3	43.11		D30	Durometer of ballistic gelatin sample following 30 minutes of warming at room temperature (~22 °C)
one	1	54.52
one	2	53.8
one	3	53.11
two	1	57.21
two	2	56.8
two	3	56.99
three	1	57.18
three	2	58.03
three	3	56.65
four	1	60.47
four	2	60.7
four	3	59.52

## Sheet: BGmodel
Group	Duro		Variable	Definition
GFnoskin	37.175		Group	Treatment group (out of four) which included cast Gelfish models and real (bluegill sunfish) samples
GFnoskin	35.085		GFnoskin	Gelfish model (bluegill cast) composed of 25% ballistic gelatin but did NOT contain surrogate skin layers (Plasti Dip)
GFnoskin	36.465		GFskin	Gelfish model (bluegill cast) composed of 25% ballistic gelatin WITH three surrogate skin layers (Plasti Dip)
GFskin	64.27		Fishall	Actual whole-fish sample (bluegill sunfish) with skin and scales intact
GFskin	60.825		Fnoscale	Actual whole-fish sample (bluegill sunfish) with scales removed but skin remains intact
GFskin	59.7		Duro	Durometer of (a) ballistic gelatin sample following 30 minutes of warming at room temperature (~22 °C) or (b) whole-fish samples
Fishall	64.7667
Fishall	65.4148
Fishall	70.337
Fnoscale	47.5074
Fnoscale	57.1
Fnoscale	57.4
